# Supplementary material for: Photoelectrochemical reduction of CO2to HCOOH on silicon photocathodes with reduced SnO2porous nanowire catalysts
Source: Royal Society of Chemistry journal article supplement (doi:10.1039/c7ta09672k), 2018-01-01
Supplement: c7ta09672k1.pdf [file c7ta09672k1.pdf]

SUPPORTING INFORMATION

**Photoelectrochemical Reduction of CO<sub>2</sub> to HCOOH on Silicon  
Photocathodes with Reduced SnO<sub>2</sub> Porous Nanowire Catalysts**

K. Ramachandra Rao,<sup>a,b</sup> Sahar Pishgar,<sup>b</sup> Jacob Strain,<sup>b</sup> Bijandra Kumar,<sup>b,c</sup> Veerendra Atla,<sup>b</sup> Sudesh Kumari,<sup>b</sup> and Joshua M. Spurgeon<sup>b\*</sup>

**Si/Sn-pNW interface cross-section**

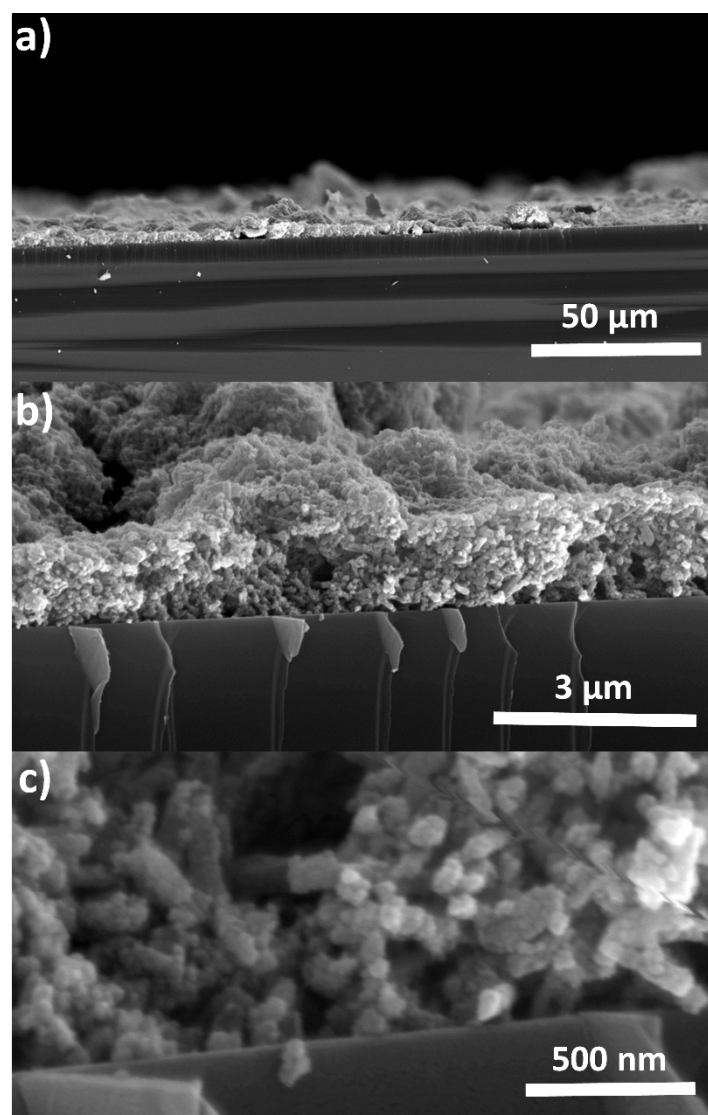

**Fig. S1.** SEM cross-sectional images of as-deposited Sn-pNWs on Si at low (a), mid (b), and high (c) magnification.

**Si/Sn-pNW elemental mapping**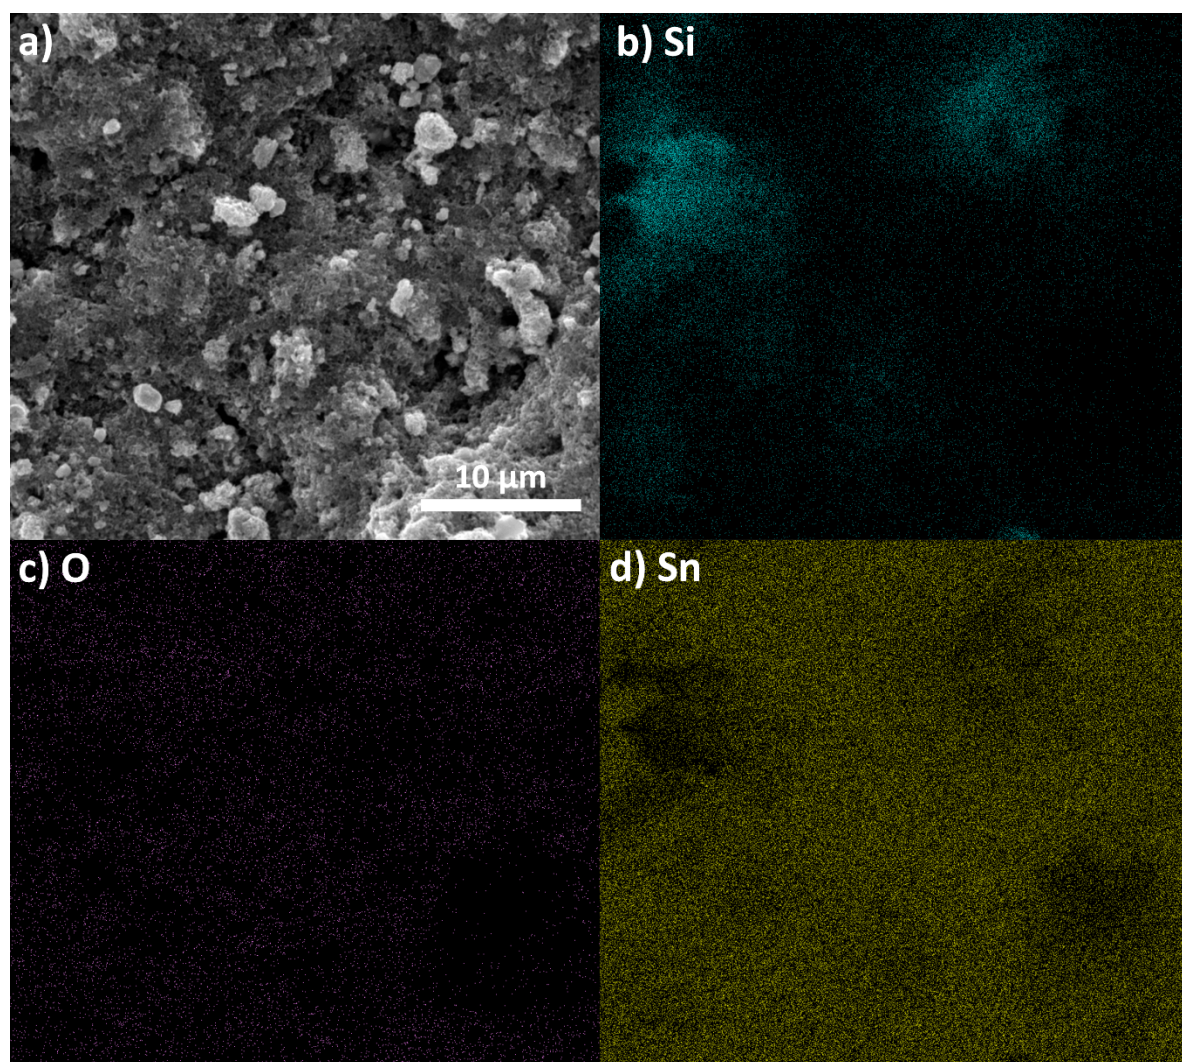

**Fig. S2.** Top-down (a) SEM image and corresponding EDS map for (b) Si, (c) O, and (d) Sn for an  $n^+p$ -Si/Sn-pNWs electrode.

## Cyclic voltammetry for FTO/Sn-pNWs

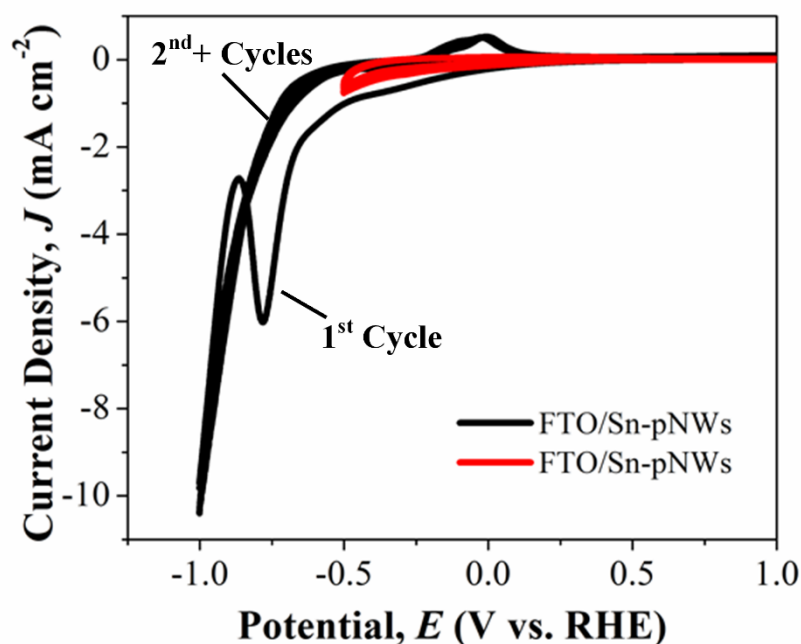

**Fig. S3.** Current density vs. potential ( $J$ - $E$ ) behavior for FTO/Sn-pNW electrodes in 0.1 M  $\text{KHCO}_3$  bubbled with  $\text{CO}_2$  in the absence of stirring. One electrode was measured to cathodic potentials up to -1.0 V vs. RHE (black), while a second electrode was only measured to -0.5 V vs. RHE.

When the Sn-pNWs on an FTO substrate were first measured as-deposited, significant reductive current was observed as the potential was scanned more cathodic. This reduction current began at  $\sim -0.1$  V vs. RHE and spiked at -0.75 V vs. RHE. This reductive current is likely ascribable to the reduction of the oxide form of the Sn-pNW catalysts. Once the oxide is fully reduced electrochemically, this behavior was not observed on subsequent scans. However, an oxidative current peak at  $\sim 0$  V vs. RHE, which was not observed on the first scan, showed up consistently in subsequent scans. A second electrode was measured in which the cathodic vertex potential was limited to -0.5 V vs. RHE (red curve above) and did not show this anodic redox peak over 4+ cycles. Thus, it was concluded that the oxidative peak represents the oxidation of products that were formed by the reductive current on the electrode when it was at potentials below -0.5 V vs. RHE. In this range, the FTO/Sn-pNWs form primarily  $\text{HCOOH}$  and  $\text{H}_2$  (see main manuscript Fig. 3a). From the shape of the oxidation current peak, it appears to consist of two redox events. The hydrogen evolution redox potential is 0 V vs. RHE, but  $\text{CO}_2$  reduction to  $\text{HCOOH}$  occurs at -0.25 V vs. RHE.<sup>1</sup> Thus, the oxidation current observable at  $< 0$  V was attributed to the oxidation of formic acid, and above 0 V, the oxidation of hydrogen contributed as well.

**Transmittance and absorbance of the catalyst layer**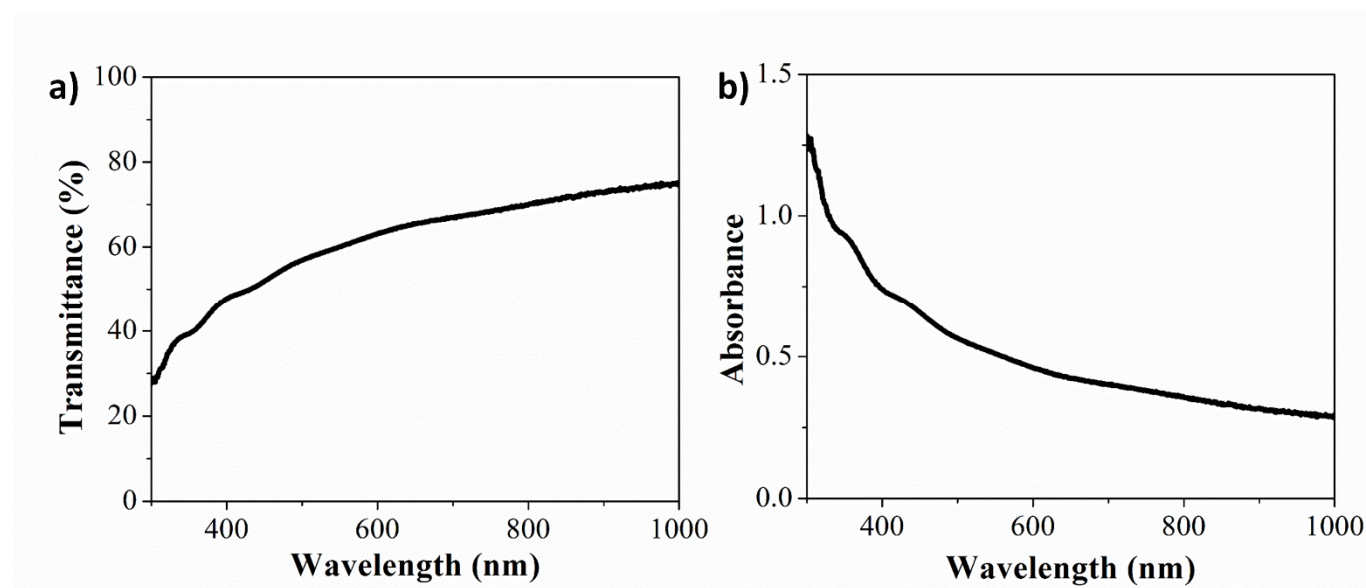

**Fig. S4.** (a) Transmittance and (b) absorbance vs. wavelength for the Sn-pNWs catalyst layer measured on an FTO/glass substrate with UV/vis spectroscopy.



## Photocurrent stability

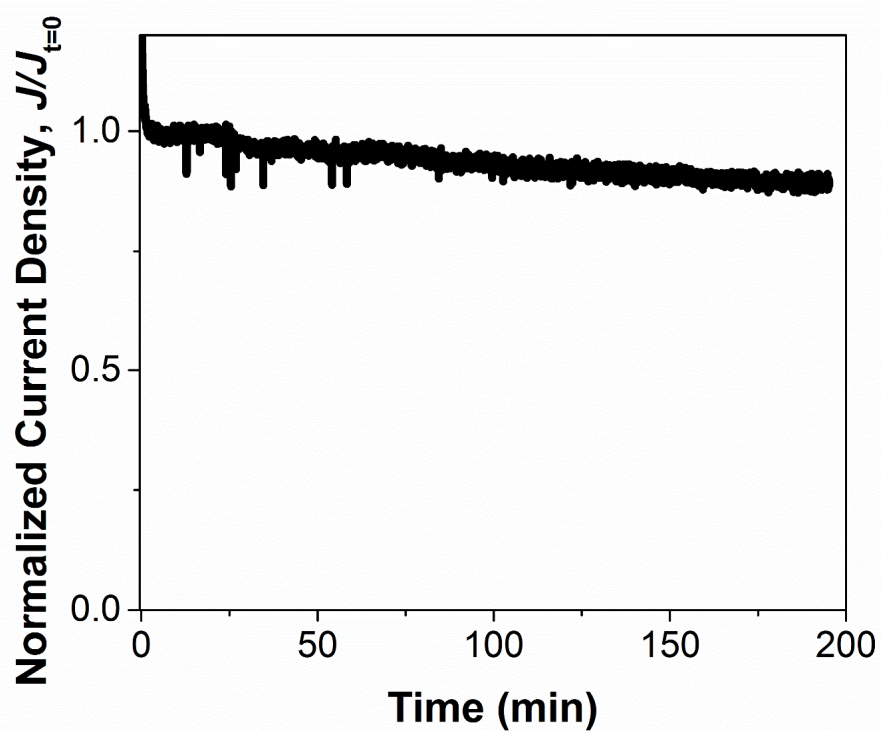

**Fig. S5.** Current density relative to the initial current density vs. time for n<sup>+</sup>p-Si/Sn-pNWs at -0.4 V vs. RHE under 1 Sun AM1.5 illumination in CO<sub>2</sub>-saturated 0.1 M KHCO<sub>3</sub>.

**CO<sub>2</sub> reduction product distribution of a bare Si photoelectrode**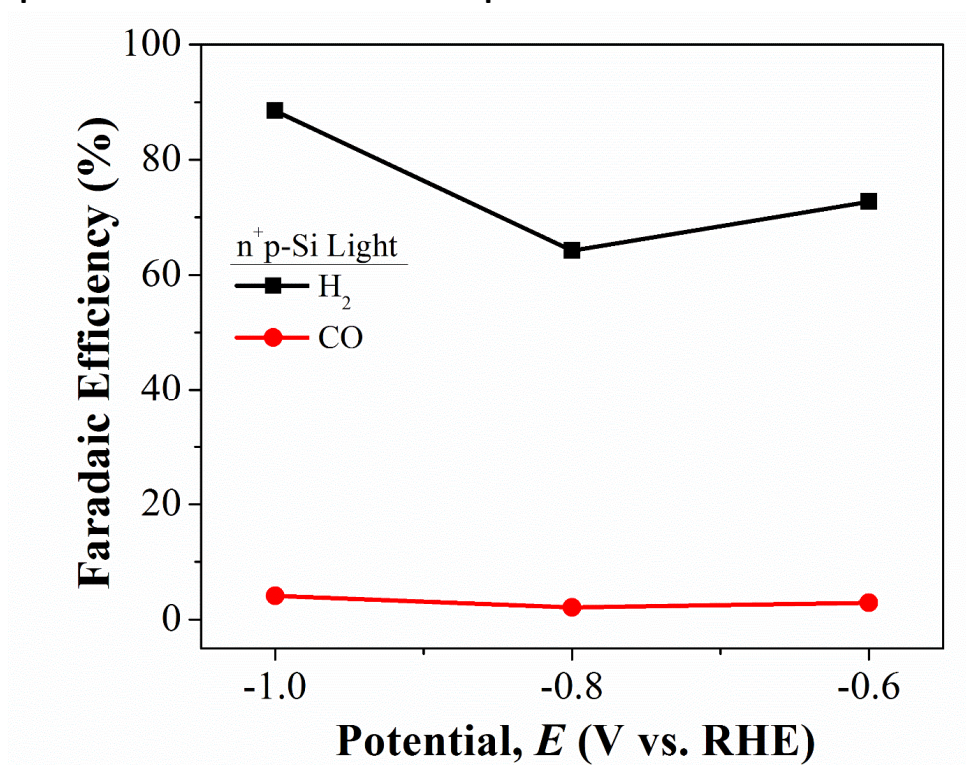

**Fig. S6.** CO<sub>2</sub> reduction product distribution in CO<sub>2</sub>-saturated 0.1 M KHCO<sub>3</sub>. Faradaic efficiency vs. potential for bare n<sup>+</sup>p-Si under 1 Sun AM1.5 illumination.

**References**

1. B. Kumar, J. P. Brian, V. Atla, S. Kumari, K. A. Bertram, R. T. White and J. Spurgeon, *Catal. Today*, 2016, **270**, 19-30.
